# Supplementary material
Source: PubMed Central journal article supplement (PMC3135929)
Supplement: supp_pp.111.175257_175257Supplemental_Figure_S1.pdf [file supp_pp.111.175257_175257Supplemental_Figure_S1.pdf]

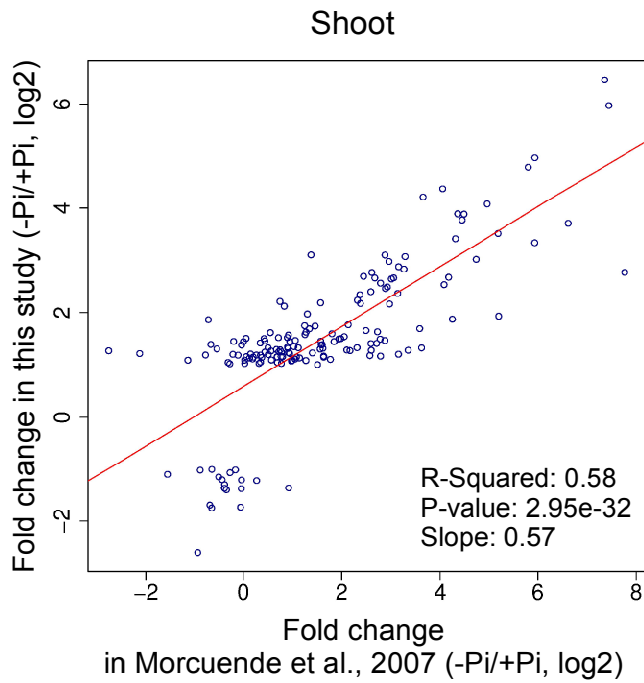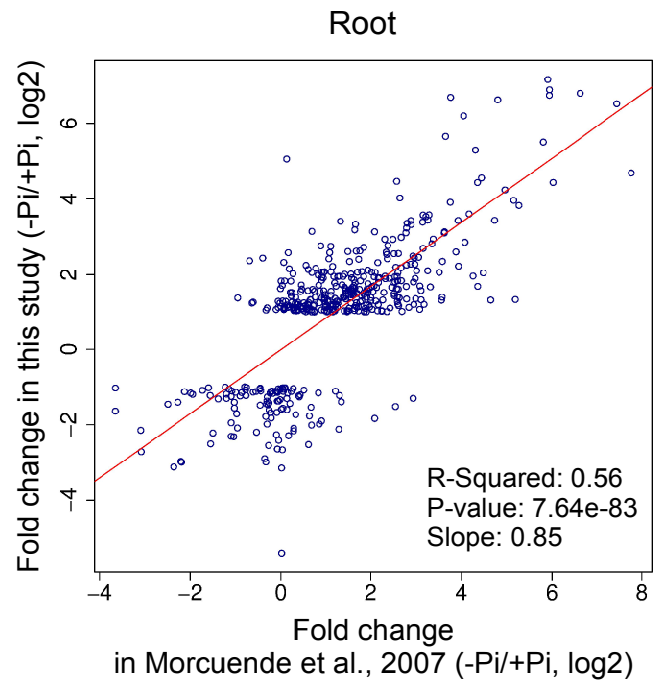

### Supplemental Figure S1

Comparison of 163 and 455 differentially expressed genes (> 2-fold change) in wild-type shoots and roots under -Pi conditions, respectively, with those reported by Morcuende et al. (Morcuende et al., 2007).
