# Supplementary material
Source: PubMed Central journal article supplement (PMC3135929)
Supplement: supp_pp.111.175257_175257Supplemental_Figure_S2.pdf [file supp_pp.111.175257_175257Supplemental_Figure_S2.pdf]

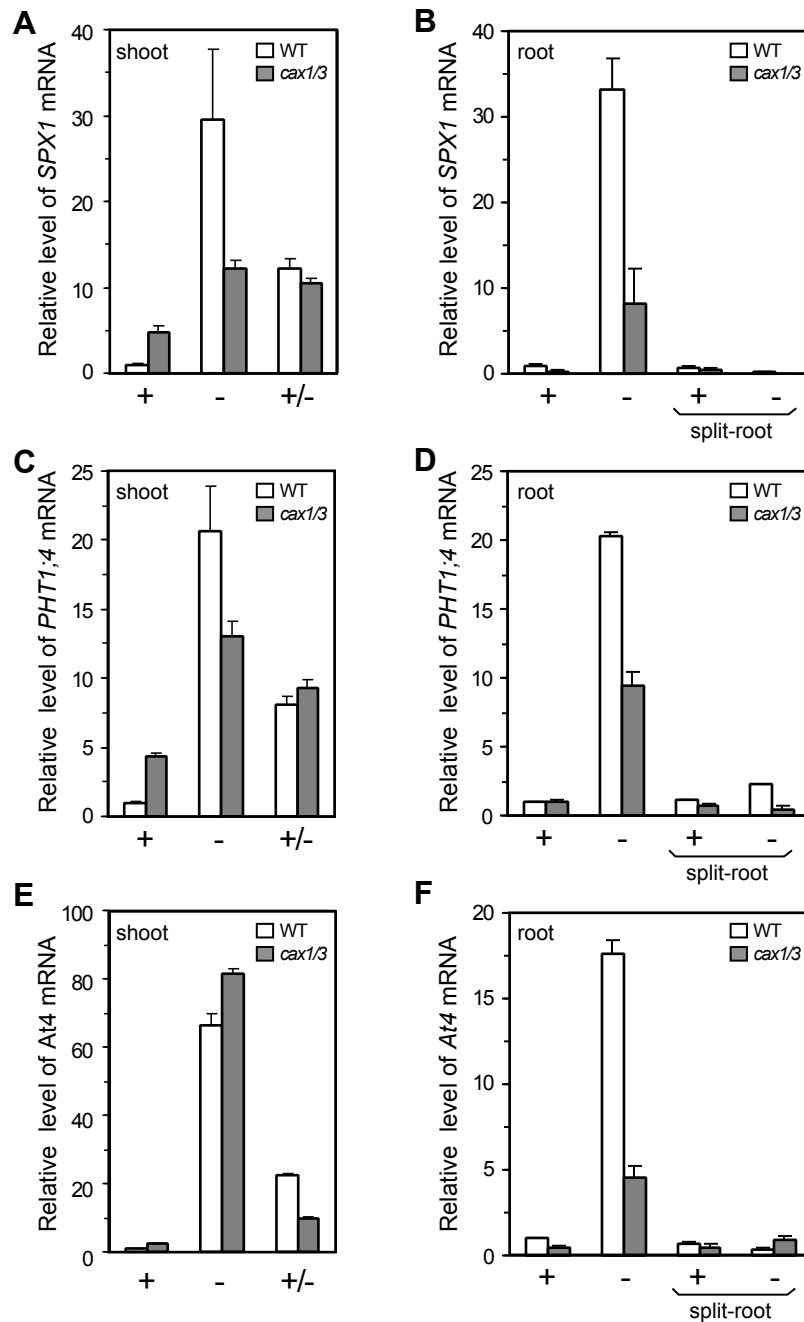

### Supplemental Figure S2

qRT-PCR analysis of *SPX1* (A and B), *PHT1;4* (C and D) and *At4* (E and F) expression in the shoot (A, C and E) and root (B, D, and F) of split-root wild-type and *cax1/cax3* plants. Plants were grown on +Pi (250  $\mu$ M  $\text{KH}_2\text{PO}_4$ ) plates for 17 days, and transferred to Petri dishes divided into two sections with roots split into two halves, and grown for another 5 days (+: plants grown in +Pi; -: plants grown in -Pi; +/-: plants with one half of roots in +Pi and the other half in -Pi). Error bars represent SD of two technical repeats.
