# Supplementary material
Source: PubMed Central journal article supplement (PMC3135929)
Supplement: supp_pp.111.175257_175257Supplemental_Figure_S3.pdf [file supp_pp.111.175257_175257Supplemental_Figure_S3.pdf]

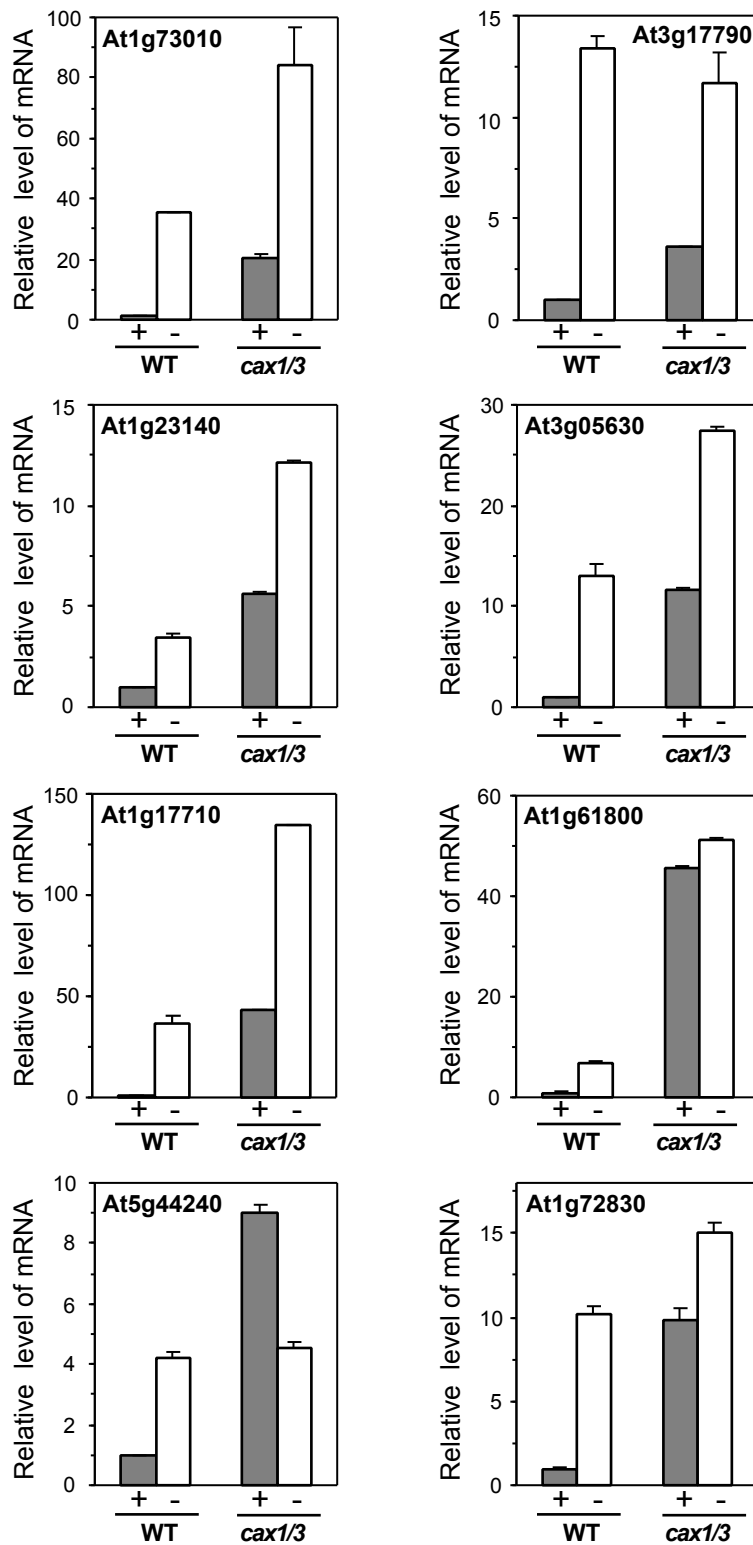

### Supplemental Figure S3

qRT-PCR analysis of several PSR genes in the shoot of wild-type and *cax1/3* plants under Pi (+) or Pi (-) conditions. The value for each gene is presented as the fold change relative to the expression of wild-type plants under +Pi conditions. Error bars represent SD of two technical repeats.
