# Supplementary material
Source: PubMed Central journal article supplement (PMC3135929)
Supplement: supp_pp.111.175257_175257Supplemental_Table_S3.pdf [file supp_pp.111.175257_175257Supplemental_Table_S3.pdf]

**Supplemental Table S3.** Sequences of qRT-PCR primers used in this study.

| <b>Gene</b> | <b>Primer name</b> | <b>Sequence (5' to 3')</b>   |
|-------------|--------------------|------------------------------|
| At4g05320   | UBQ10 forward      | GGCCTTGTATAATCCCTGATGAATAAG  |
|             | UBQ10 reverse      | AAAGAGATAACAGGAACGGAAACATAGT |
| At2g33770   | PHO2 forward       | AGGTTTGAAGCTCCACCCTCA        |
|             | PHO2 reverse       | CCCAAGATGTGATTGGAGTTCC       |
| At4         | At4 forward        | AACCCTAACAACATCCATTGTTGAA    |
|             | At4 reverse        | GAAACTTGAACCTCTCAAACCCT      |
| At2g38940   | PHT 1;4 forward    | GGTCCCAATAGTTTAGGTGAT        |
|             | PHT 1;4 reverse    | AGTTGCTAGAGACAAGGAGAA        |
| At5g20150   | SPX1 forward       | GATTCCATTGTTGGAGCAAGA        |
|             | SPX1 reverse       | AATCTGTTAGCTTCTTCTATTGTA     |
| At2g45130   | SPX3 forward       | CCGATCTCTTCATCTATCTT         |
|             | SPX3 reverse       | TTACGATAATGTCATATTGCGT       |
| At2g38170   | CAX1 forward       | CTCTTGCTTTGCTATTTTCATTATTGC  |
|             | CAX1 reverse       | GTTGCAGTGACGACATTGTTC        |
| At3g51860   | CAX3 forward       | GATTTGGACGTGGGACTTCAA        |
|             | CAX3 reverse       | GAGAAAACCTTCTCCCAAATTGTTTCAT |
| At1g73010   | At1g73010 forward  | GCTCTTCGTGTGTCTCAGTCTAGTT    |
|             | At1g73010 reverse  | CACCACAGTTGTAAATCTTCTTCCT    |
| At3g17790   | ACP5 forward       | GATTCTTAAGTCCTATTGCA         |
|             | ACP5 reverse       | ATGCTAAACTAAGCAGGAA          |
| At1g23140   | At1g23140 forward  | ATCAATGTTACTGGTTCAAGCGAT     |
|             | At1g23140 reverse  | GCTGCCTTATTACAAATCAGAAGAA    |
| At3g05630   | PLDzeta2 forward   | CGCCCAGTTCTCTTTAATCAGTT      |
|             | PLDzeta2 reverse   | GAACCTAGGAAGCAATCAAATGAA     |
| At1g17710   | At1g17710 forward  | GTATTCGAGATATTCTTCATGCAA     |
|             | At1g17710 reverse  | ACTTAACGTGCATGAACCATT        |
| At1g61800   | At1g61800 forward  | GAGGAGAGAACATTCCGGTGA        |
|             | At1g61800 reverse  | CAAGCTCCAGTTTCTTCATATCCA     |
| At5g44240   | ALA2 forward       | TTTACGGTTCCGTGACGTTT         |
|             | ALA2 reverse       | CGCGACTTGGACTGCATT           |
| At1g72830   | At1g72830 forward  | ACCACTTCTGGCTCAGACATCA       |
|             | At1g72830 reverse  | GAACAAGCATGGCTCGGTTTAT       |
